# Supplementary material for: The cardiovascular risk profile of middle age women previously diagnosed with premature ovarian insufficiency: A case-control study
Source: PLoS One. 2020 Mar 5;15(3):e0229576. doi: 10.1371/journal.pone.0229576 (PMC7058320; doi:10.1371/journal.pone.0229576)
Supplement: S1 Appendix — (DOCX) [file pone.0229576.s001.docx]

## S2 Appendix. Membership of the CREW consortium.

The CREW consortium consists of (in alphabetical order):

Yolande Appelman1, Sara Baart2,3, Laura Benschop2,3, Eric Boersma2, Laura Brouwers3,4, Ricardo Budde2, Suzanne Cannegieter5, Nadine Daan4, Veerle Dam3,6, Rene Eijkemans4,6, Bart Fauser4, Michel Ferrari5, Arie Franx2,4, Christianne de Groot1, Marlise Gunning3,4, Annemieke Hoek7, Erik Koffijberg6,8, Wendy Koster2, Mark Kruit5, Giske Lagerweij3,6, Nils Lambalk1, Joop Laven2, Katie Linstra2,3,5, Aad van der Lugt2, Angela Maas9, Antoinette Maassen van den Brink2, Cindy Meun2,3, Saskia Middeldorp10, Karel G.M. Moons6, Bas van Rijn 2,4, Jeanine Roeters van Lennep2, Jolien Roos-Hesselink2, Luuk Scheres3,10, Yvonne T. van der Schouw6, Eric Steegers2, Regine Steegers2, Gisela Terwindt5, Birgitta Velthuis3,4, Marieke Wermer5, Bart Zick2,5, Gerbrand Zoet3,4.

1 Amsterdam UMC – location VUmc, Amsterdam, the Netherlands

2 Erasmus University Medical Center, Rotterdam, the Netherlands

3 Netherlands Heart Institute, Utrecht, the Netherlands

4 University Medical Center Utrecht, Utrecht, the Netherlands

5 Leiden University Medical Center, Leiden, the Netherlands

6 Julius Center, Utrecht, University Medical Center, Utrecht, the Netherlands

7 University Medical Center Groningen, Groningen, the Netherlands

8 University of Twente, Enschede, the Netherlands

9 Radboud University Medical Center, Nijmegen, the Netherlands

10 Amsterdam UMC – location AMCenter, Amsterdam, the Netherlands
